# Supplementary material for: (N-Alkyloxalamido)-Amino Acid Amides as the Superior Thixotropic Phase Selective Gelators of Petrol and Diesel Fuels
Source: MDPI journal article supplement (doi:10.3390/gels9110852), 2023-10-27
Supplement: s1 [file s1]

## Supporting Material

# (*N*-Alkyloxalamido)-Amino Acid Amides as the Superior Thixotropic Phase Selective Gelators of Petrol and Diesel Fuels

Nataša Šijaković Vujičić <sup>1,\*</sup>, Janja Makarević <sup>1</sup>, Jasminka Popović <sup>2</sup>, Zoran Štefanić <sup>3</sup> and Mladen Žinić <sup>4,\*</sup>

<sup>1</sup> Ruđer Bošković Institute, Division of Organic Chemistry and Biochemistry, Bijenička 54, 10000 Zagreb, Croatia; pmance@irb.hr

<sup>2</sup> Ruđer Bošković Institute, Division of Materials Physics, Laboratory for Synthesis and Crystallography of Functional Materials, Bijenička 54, 10000 Zagreb, Croatia; jasminka.popovic@irb.hr

<sup>3</sup> Ruđer Bošković Institute, Division of Physical Chemistry, Laboratory for Chemical and Biological Crystallography, Bijenička 54, 10000 Zagreb, Croatia; zoran.stefanic@irb.hr

<sup>4</sup> Croatian Academy of Sciences and Arts, Nikole Šubića Zrinskog 11, 10000 Zagreb, Croatia

\* Correspondence: nsijakov@irb.hr (N.Š.V.); zinic@irb.hr (M.Ž.)

## Chemical synthesis of the compounds

### General

Reagents were purchased from Aldrich, Fluka, Kemika, Merck and Sigma, and were used without further purification. All solvents were purified and dried according to standard procedures. The reactions were monitored by thin layer chromatography (TLC) on Merck Kieselgel HF254 plastic sheets and spots were made visible using a UV lamp (254 nm) or I<sub>2</sub> vapours. Prepared compounds were purified chromatographically by preparative T.L.C. using silica gel Merck HF254 and by column chromatography using silica 0.063-0.2 mm (Merck).

### General procedure for preparation of *N*- alkyl, *N'*- *L* - methyllleucyl(phenylalanyl) oxalamides

Preparation of *N*-(ethoxyoxalyl)-*L*-leucine(phenylalanine)methyl ester (**3**, **4**); To a cooled (0 °C) solution of hydrochloride of amino acid **1** and **2** (1 mmol) and TEA (2 mmol) in dry CH<sub>2</sub>Cl<sub>2</sub> (10 ml) a solution of oxalyl chloride (1 mmol) in dry CH<sub>2</sub>Cl<sub>2</sub> (5 ml) was added dropwise during the 15 minutes. The reaction mixture was stirred for 30 min at 0 °C and 20 hours at room temperature. Afterwards, CH<sub>2</sub>Cl<sub>2</sub> (10 ml) was added and the mixture was washed successively with 5 % HCl, 5 % NaHCO<sub>3</sub> and water. The organic layer was dried over Na<sub>2</sub>SO<sub>4</sub> and the solvent was removed under reduced pressure. The ester

obtained in this way was used without additional purification. b) To the solution of *N*-(ethoxyoxalyl)-*L*-leucine(phenylalanine)methyl ester (**3**, **4**) in dry CH<sub>2</sub>Cl<sub>2</sub> alkylamine was added and the reaction mixture was stirred for 3 days at room temperature. The product was purified by crystallisation (CH<sub>2</sub>Cl<sub>2</sub>-light petroleum) or preparative TLC chromatography (EtOAc-light petroleum, 100:25).

#### ***N*-butyloxalamido-*L*-leucine methyl ester (**5**)**

To the solution of *N*-(ethoxyoxalyl)-*L*-leucine methyl ester **3** (0.270 g, 1.01 mmol) in dry CH<sub>2</sub>Cl<sub>2</sub> (10 ml) *n*-butylamine (0.110 ml, 1.113 mmol) was added and the reaction mixture was stirred for 3 days at room temperature. The product was purified by crystallisation (CH<sub>2</sub>Cl<sub>2</sub>-light petroleum) and by preparative TLC chromatography (EtOAc-light petroleum, 200:50). Yield: 78.7 %; [α]<sub>D</sub> = - 13 (c 1, CH<sub>2</sub>Cl<sub>2</sub>); <sup>1</sup>H NMR (DMSO-*d*<sub>6</sub>): δ 8.94 (1 H, d, *J* = 8.3, NH<sub>Leu</sub>), 8.77 (1 H, t, *J* = 5.7, NH<sub>butyl</sub>), 4.36 (1 H, ddd, *J*=3.6, *J*=8.3, *J*=11.1, CH<sub>α, Leu</sub>), 3.63 (3 H, s, OCH<sub>3</sub>), 3.18 - 3.09 (2 H, m, CH<sub>2</sub>N), 1.86 - 1.78, 1.59 - 1.49, 1.48 - 1.39, 1.31 - 1.19 (1H, 2H, 2H, 2H, 4 m, CH<sub>β, Leu</sub>, CH<sub>2, (β, Leu)</sub>, CH<sub>2, butyl</sub>), 0.89 - 0.83 (9 H, CH<sub>3(γ, Leu)</sub> and CH<sub>3, butyl</sub>), 13 C NMR (DMSO-*d*<sub>6</sub>): δ 171.9 (COOMe), 160.3, 159.4 (CON), 52.0 (OCH<sub>3</sub>), 50.4 (CH<sub>α, Leu</sub>), 38.9, 38.5 (CH<sub>2(β, Leu)</sub>, CH<sub>2Nbutyl</sub>), 30.7, 19.5 (CH<sub>2, butyl</sub>), 24.3, 22.8, 21.0 (CH<sub>γ, Leu</sub>), CH<sub>3, σ, Leu</sub>), 13.5 CH<sub>3, butyl</sub>); IR: 3300, 1749, 1652, 1521.

#### ***N*-hexyloxalamido-*L*-leucine methyl ester (**6**)**

To the solution of *N*-(ethoxyoxalyl)-*L*-leucine methyl ester (**3**) (1.066 g, 4.346 mmol) in dry CH<sub>2</sub>Cl<sub>2</sub> (40 ml) *n*-hexylamine (0.64 ml, 4.968 mmol) was added and the reaction mixture was stirred for 3 days at room temperature. The product was purified by crystallisation (CH<sub>2</sub>Cl<sub>2</sub>-light petroleum) and by preparative TLC chromatography (EtOAc-light petroleum, 200:50). Yield: 70 %; [α]<sub>D</sub> = - 12 (c 1, CH<sub>2</sub>Cl<sub>2</sub>); <sup>1</sup>H NMR (DMSO-*d*<sub>6</sub>): δ 8.93 (1 H, d, *J* = 8.4, NH<sub>Leu</sub>), 8.76 (1 H, t, *J* = 5.8, NH<sub>hexyl</sub>), 4.36 (1H, ddd, *J* = 3.5, *J* = 8.4, *J* = 10.6, CH<sub>α, Leu</sub>), 3.63 (3 H, s, OCH<sub>3</sub>), , 3.16 - 3.08 (2H, m, CH<sub>2</sub>N), 1.86 - 1.77, 1.59 - 1.50, 1.49 - 1.41, 1.31- 1.18 (1 H, 2 H, 2 H, and 4 H, 4 m, CH<sub>β, Leu</sub>, CH<sub>2 (β, Leu)</sub>, CH<sub>2, hexyl</sub>), 0.88, 0.84 (6 H, 2 d, *J* = 5.9, CH<sub>3(γ, Leu)</sub>), 0.86 (3 H, t, *J* = 6.9, CH<sub>3, hexyl</sub>), 13 C NMR (DMSO-*d*<sub>6</sub>): δ 172.4 (COOMe), 160.8, 159.8 (CON), 52.5 (OCH<sub>3</sub>), 50.9 (CH<sub>α, Leu</sub>), 39.4, 39.3 (CH<sub>2 (β, Leu)</sub>, CH<sub>2</sub>N), 31.4, 29.1, 26.4, 22.5

(CH<sub>2</sub>, hexyl), 24.7, 23.3, 21.5 (CH<sub>γ</sub>, Leu), CH<sub>3</sub>, σ, Leu), 14.3 CH<sub>3</sub>, hexyl); IR: 3294, 1745, 1687, 1653, 1525.

#### ***N*-hexyloxalamido-*L*-phenylalanine methyl ester (7)**

To the solution of *N*-(ethoxyoxalyl)-*L*-phenylalanine methyl ester (4) (4.900 g, 17.544 mmol) in dry CH<sub>2</sub>Cl<sub>2</sub> (60 ml) *n*-hexylamine (2.32 ml, 17.562 mmol) was added and the reaction mixture was stirred for 3 days at room temperature. The product was purified by preparative TLC chromatography (EtOAc-light petroleum, 200:50). Yield: 75 %; <sup>1</sup>H NMR (DMSO-*d*<sub>6</sub>): δ 8.92 (1 H, d, *J* = 8.5, NH<sub>Phe</sub>), 8.71 (1 H, t, *J* = 6.0, NH<sub>hexyl</sub>), 7.32-7.10 (5 H, m, CH<sub>arom</sub>), 4.57 (1H, dt, *J* = 5.9, *J* = 8.5, CH<sub>α</sub>, Phe), 3.64 (3 H, s, OCH<sub>3</sub>), 3.17 - 3.01 (4 H, m, CH<sub>2</sub>N and CH<sub>2</sub>(β, Phe)), 1.49 - 1.32, 1.32 - 1.08 (2 H and 4 H, 2m, CH<sub>2</sub>, hexyl), 0.85 (3 H, t, *J* = 6.8, CH<sub>3</sub>, hexyl), <sup>13</sup>C NMR (CDCl<sub>3</sub>): δ 170.7 (COOMe), 159.6, 159.0 (CON), 136.4 (C<sub>arom</sub>), 129.2, 128.8, 127.3 (CH<sub>arom</sub>), 53.7, 52.5 (CH<sub>α</sub>, Phe and OCH<sub>3</sub>), 39.7, 37.8 (CH<sub>2</sub> (β, Phe, and CH<sub>2</sub>N), 31.4, 29.1, 26.5, 22.5 (CH<sub>2</sub>, hexyl), 14.0 CH<sub>3</sub>, hexyl).

#### ***N*-dodecyloxalamido-*L*-leucine methyl ester (8)**

To the solution of *N*-(ethoxyoxalyl)-*L*-leucine methyl ester (3) (0.372 ml, 1.517 mmol) in dry CH<sub>2</sub>Cl<sub>2</sub> (20 ml), *n*-dodecylamine (0.35 ml, 1.522 mmol) was added and the reaction mixture was stirred for 3 days at room temperature. The product was purified by crystallisation (CH<sub>2</sub>Cl<sub>2</sub>-light petroleum) and by preparative TLC chromatography (EtOAc-light petroleum, 200:50). Yield: 70.3 %; [α]<sub>D</sub> = - 9.5 (c 1, CH<sub>2</sub>Cl<sub>2</sub>); <sup>1</sup>H NMR (DMSO-*d*<sub>6</sub>): δ 8.93 (1 H, d, *J* = 8.1, NH<sub>Leu</sub>), 8.76 (1 H, t, *J* = 5.6, NH<sub>dodecyl</sub>), 4.39 - 4.32 (1H, m, CH<sub>α</sub>, Leu), 3.63 (3 H, s, OCH<sub>3</sub>), 3.12 (2 H, q, *J* = 6.6, CH<sub>2</sub>N), 1.89 - 1.75, 1.61 - 1.50, 1.49 - 1.39 (1 H, 2 H, 2 H, 18 H, 4 m, CH<sub>γ</sub>, Leu, CH<sub>2</sub> (β, Leu), CH<sub>2</sub>, dodecyl), 0.90 - 0.82 (9 H, m, CH<sub>3</sub>(γ, Leu) and CH<sub>3</sub>, dodecyl); <sup>13</sup>C NMR (DMSO-*d*<sub>6</sub>): δ 172.4 (COOMe), 160.8, 159.8 (CON), 52.5 (OCH<sub>3</sub>), 50.9 (CH<sub>α</sub>, Leu), 39.4, 39.3 (CH<sub>2</sub> (β, Leu), CH<sub>2</sub>N<sub>dodecyl</sub>), 31.8, 29.51, 29.47, 29.45, 29.42, 29.17, 29.14, 29.10, 26.8, 22.5 (CH<sub>2</sub>, dodecyl), 24.8, 23.3, 21.5 (CH<sub>γ</sub>, Leu), CH<sub>3</sub>, σ, Leu), 14.4 CH<sub>3</sub>, dodecyl); IR: 3300, 1750, 1656, 1524.

#### **General procedure for preparation of *N* - alkyl, *N'* - *L* – aminoacid amide - oxalamides**

The solution of ester in CH<sub>2</sub>Cl<sub>2</sub> and conc. NH<sub>3</sub>/MeOH was kept for 7 days at 4-8 °C. The precipitate was filtered off, washed with MeOH and dried under reduced pressure or the solvent was evaporated at reduced pressure.

#### ***N*-Butyloxalamido-*L*-leucylamide (9)**

The solution of *N*-butyloxalamido-*L*-leucine methyl ester (**5**) (0.380 g, 1.395 mmol) in CH<sub>2</sub>Cl<sub>2</sub> (1 ml) and conc. NH<sub>3</sub>/MeOH (35 ml) was kept for 7 days at 4 -8 °C. The precipitate was filtered off, and washed with MeOH. Yield: 89 %; <sup>1</sup>H NMR (DMSO-d<sub>6</sub>): δ 8.78 (1 H, t, J = 6.0, NH<sub>butyl</sub>), 8.36 (1 H, d, J = 9.0, NH<sub>Leu</sub>), 7.48, 7.11 (2 x 1 H, 2 s, CONH<sub>2</sub>), 4.28 (1H, dt, J = 9.3, J = 4.0, CH<sub>α, Leu</sub>), 3.21 - 3.04 (2 H, m, CH<sub>2</sub>N), 1.72 - 1.14 (7 H, m, CH<sub>α</sub>, CH<sub>2(β, Leu)</sub>, CH<sub>2, butyl</sub>), 0.96 - 0.71 (9 H, m, CH<sub>3(γ, Leu)</sub> and CH<sub>3, butyl</sub>); <sup>13</sup>C NMR (DMSO-d<sub>6</sub>): δ 173.6 (CONH<sub>2</sub>), 160.04, 160.01 (CON), 51.8 (CH<sub>α</sub>), 41.4, 39.0 (CH<sub>2(β, Leu)</sub>, CH<sub>2, butyl</sub>), 31.2, 20.0 (CH<sub>2, butyl</sub>), 24.8 (CH<sub>γ, Leu</sub>), 23.5, 21.9 (CH<sub>3(δ, Leu)</sub>), 14.1 (CH<sub>2, butyl</sub>); IR: 3437, 3385, 3288, 3207, 1687, 1652, 1615, 1519.

#### ***N*-hexyloxalamido-*L*-leucylamide (10)**

The solution of *N*-hexyloxalamido-*L*-leucine methyl ester (**6**) (0.375 g, 1.248 mmol) in CH<sub>2</sub>Cl<sub>2</sub> (1 ml) and conc. NH<sub>3</sub>/MeOH (30 ml) was kept for 7 days at 4 -8 °C. The precipitate was filtered off, and washed with MeOH. Yield: 86.2 %; <sup>1</sup>H NMR (DMSO-d<sub>6</sub>): δ 8.78 (1 H, t, J = 6.0, NH<sub>hexyl</sub>), 8.37 (1 H, d, J = 9.0, NH<sub>Leu</sub>), 7.48, 7.11 (2 x 1 H, 2 s, CONH<sub>2</sub>), 4.28 (1H, dt, J = 9.2, J = 3.9, CH<sub>α, Leu</sub>), 3.17 - 3.07 (2 H, m, CH<sub>2</sub>N), 1.72 - 1.14 (11 H, m, CH<sub>α</sub>, CH<sub>2(β, Leu)</sub>, CH<sub>2, hexyl</sub>), 0.92 - 0.80 (9 H, m, CH<sub>3(γ, Leu)</sub> and CH<sub>3, hexyl</sub>); <sup>13</sup>C NMR (DMSO-d<sub>6</sub>): δ 173.6 (CONH<sub>2</sub>), 160.05, 159.99 (CON), 51.8 (CH<sub>α, Leu</sub>), 41.4, 39.4 (CH<sub>2(β, Leu)</sub>, CH<sub>2, hexyl</sub>), 31.4, 29.1, 26.4, 22.5 (CH<sub>2, hexyl</sub>), 24.8 (CH<sub>γ, Leu</sub>), 23.5, 21.9 (CH<sub>3(δ, Leu)</sub>), 14.3 (CH<sub>2, hexyl</sub>); IR: 3432, 3385, 3287, 3208, 1685, 1652, 1515.

#### ***N*-hexyloxalamido-*L*-phenylalaninamide (11)**

The solution of *N*-hexyloxalamido-*L*-phenylalanine methyl ester (**7**) (0.023 g, 0.0658 mmol) in CH<sub>2</sub>Cl<sub>2</sub> (0.5 ml) and conc. NH<sub>3</sub>/MeOH (5 ml) was kept for 7 days at 4 -8 °C. The precipitate was filtered off, and washed with MeOH. Yield: 80.9 %; <sup>1</sup>H NMR (DMSO-d<sub>6</sub>):

$\delta$  8.67 (1 H, t,  $J = 5.9$ ,  $\text{NH}_{\text{hexyl}}$ ), 8.37 (1 H, d,  $J = 8.7$ ,  $\text{NH}_{\text{Phe}}$ ), 7.58, 7.25 (2H, 2 s,  $\text{CONH}_2$ ), 7.28-7.13 (5 H, m,  $\text{CH}_{\text{arom}}$ ), 4.47 (1H, dt,  $J = 4.5$ ,  $J = 8.9$ ,  $\text{CH}_{\alpha, \text{Phe}}$ ), 3.13 - 3.03 (4 H, m,  $\text{CH}_2\text{N}$  and  $\text{CH}_2\text{A}$  ( $\beta$ ,  $\text{Phe}$ )), 2.99 (1H, dd,  $J = 9.2$ ,  $J = 13.7$ ,  $\text{CH}_2\text{B}$  ( $\beta$ ,  $\text{Phe}$ )), 1.46 - 1.37, 1.29 - 1.15 (2 H and 6 H, 2m,  $\text{CH}_2$  hexyl), 0.85 (3 H, t,  $J = 6.9$ ,  $\text{CH}_3$ , hexyl),  $^{13}\text{C}$  NMR ( $\text{DMSO-d}_6$ ):  $\delta$  171.9 ( $\text{CONH}_2$ ), 159.4, 159.3 (CON), 137.5 ( $\text{C}_{\text{arom}}$ ), 129.1, 128.0, 126.3 ( $\text{CH}_{\text{arom}}$ ), 54.0 ( $\text{CH}_{\alpha, \text{Phe}}$ ), 38.8, 35.2 ( $\text{CH}_2$  ( $\beta$ ,  $\text{Phe}$ ) and  $\text{CH}_2\text{N}$ ), 30.8, 28.6, 25.9, 22.0 ( $\text{CH}_2$ , hexyl), 13.8  $\text{CH}_3$ , hexyl).

### ***N*-dodecylloxalamido-*L*-leucylamide (12)**

The solution of *N*-dodecylloxalamido-*L*-leucine methyl ester (8) (0.375 g, 0.975 mmol) in  $\text{CH}_2\text{Cl}_2$  (1 ml) and conc.  $\text{NH}_3/\text{MeOH}$  (25 ml) was kept for 7 days at 4 -8 °C. The precipitate was filtered off, and washed with MeOH. Yield 81.3%;  $^1\text{H}$  NMR ( $\text{DMSO-d}_6$ ):  $\delta$  8.78 (1 H, t,  $J = 5.9$ ,  $\text{NH}_{\text{dodecyl}}$ ), 8.36 (1 H, d,  $J = 9.1$ ,  $\text{NH}_{\text{Leu}}$ ), 7.49, 7.11 (2 x 1 H, 2 s,  $\text{CONH}_2$ ), 4.28 (1H, dt,  $J = 9.1$ ,  $J = 3.8$ ,  $\text{CH}_{\alpha, \text{Leu}}$ ), 3.18 - 3.02 (2 H, m,  $\text{CH}_2\text{N}$ ), 1.72 - 1.09 (23 H, m,  $\text{CH}_{\alpha}$ ,  $\text{CH}_2$ ( $\beta$ ,  $\text{Leu}$ ),  $\text{CH}_2$ , decyl), 0.91 - 0.81 (9 H, m,  $\text{CH}_3$ ( $\gamma$ ,  $\text{Leu}$ ) and  $\text{CH}_3$ , dodecyl);  $^{13}\text{C}$  NMR ( $\text{DMSO-d}_6$ ):  $\delta$  173.6 ( $\text{CONH}_2$ ), 160.03, 159.99 (CON), 51.8 ( $\text{CH}_{\alpha}$ ), 41.4, 39.4 ( $\text{CH}_2$ ( $\beta$ ,  $\text{Leu}$ ),  $\text{CH}_2$ , dodecyl), 31.7, 29.50, 29.47, 29.45, 29.42, 29.17, 29.14, 29.11, 26.8, 22.6 ( $\text{CH}_2$ , decyl), 24.8 ( $\text{CH}_{\gamma, \text{Leu}}$ ), 23.4, 22.0 ( $\text{CH}_3$ ( $\delta$ ,  $\text{Leu}$ ), 14.4 ( $\text{CH}_2$ , dodecyl); IR: 3389, 3291, 3198, 1686, 1653, 1511.

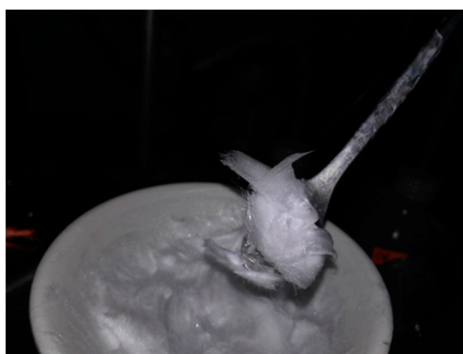

a)

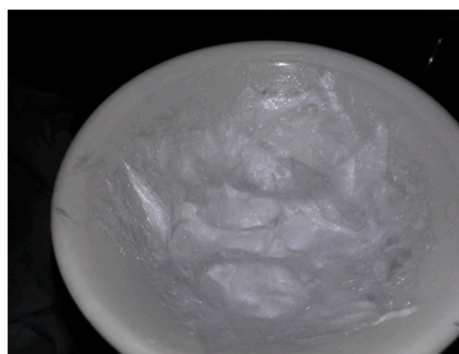

b)

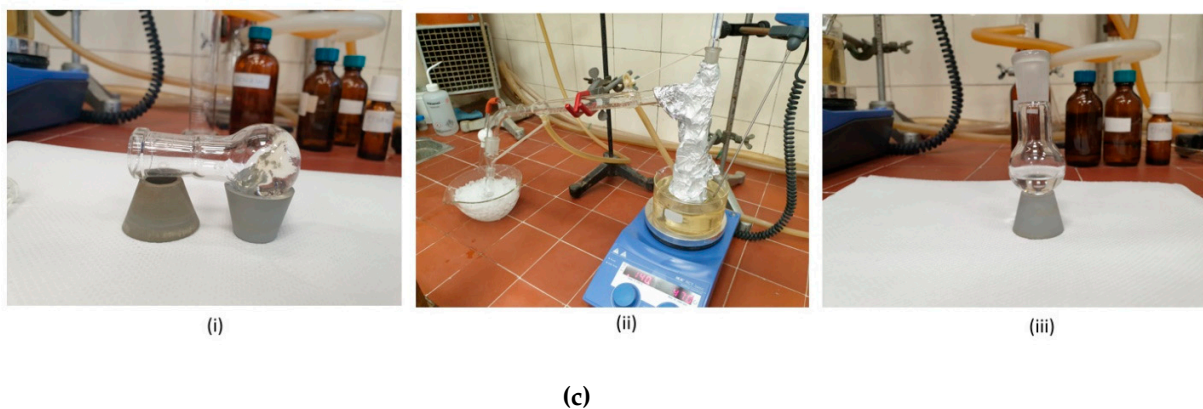

**Figure S1.** (a), (b) compound **10** isolated in high purity from methanol solution as the shining cotton-wool like material; (c) Recovery of petrol by distillation of **10** petrol gel.

### SEM investigation

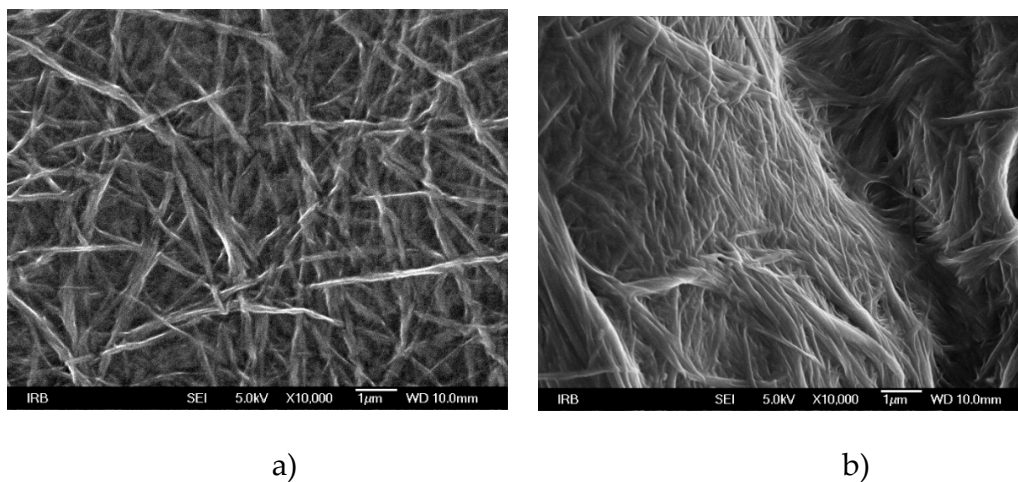

**Figure S2.** SEM images of **10** (a) toluene gel and (b) petrol gel.

### DSC study

**Table S1.**  $\Delta H_m$ ,  $T_m$  and  $T_c$  values obtained from DSC measurements of petrol, diesel and decaline gel of compound **10** in the heating and cooling cycle.

| sample | $T_m$ (°C) | $\Delta H_m$ (kJmol <sup>-1</sup> ) | $T_c$ (°C) |
|--------|------------|-------------------------------------|------------|
| petrol | 129.1      | 67.9                                | 100.1      |

|         |       |      |       |
|---------|-------|------|-------|
| diesel  | 154.3 | 47.2 | 128.3 |
| decalin | 148.6 | 41.1 | 125.2 |

### Single crystal analysis

Crystals of **10** suitable for single-crystal X-ray analysis were grown from methanol by slow evaporation at room temperature. The data collection was performed on an Xcalibur Nova X-ray diffractometer with multilayer optics and Cu K $\alpha$  radiation ( $\lambda$  = 1.5412 Å) at room temperature.

**Table S2.** Crystallographic data, structure solution, and refinement for **10** (methanol).

| Compound                                            | <b>10</b>                                                                                     |
|-----------------------------------------------------|-----------------------------------------------------------------------------------------------|
| Empirical formula                                   | C <sub>14</sub> H <sub>27</sub> N <sub>3</sub> O <sub>3</sub>                                 |
| Formula weight                                      | 285.38                                                                                        |
| Temperature (° K)                                   | 293(2)                                                                                        |
| Wavelength (Å)                                      | 1.542                                                                                         |
| Crystal system                                      | monoclinic                                                                                    |
| Space group                                         | <i>P</i> 2 <sub>1</sub>                                                                       |
| Unit cell dimensions (Å, °)                         | <i>a</i> = 7.7909(13)<br><i>b</i> = 5.1428(7)<br><i>c</i> = 20.951(5)<br>$\beta$ = 94.502(18) |
| Volume (Å <sup>3</sup> )                            | 836.9(3)                                                                                      |
| Z                                                   | 2                                                                                             |
| Density (calculated) (g cm <sup>-3</sup> )          | 1.133                                                                                         |
| Absorption coefficient (mm <sup>-1</sup> )          | 0.647                                                                                         |
| F (000)                                             | 312                                                                                           |
| Crystal size (mm)                                   | 0.1 x 0.1 x 0.3 mm                                                                            |
| Theta range for data collection (°)                 | 4.233-76.026                                                                                  |
| Index ranges                                        | -6 ≤ <i>h</i> ≤ 9, -6 ≤ <i>k</i> ≤ 6, -25 ≤ <i>l</i> ≤ 26                                     |
| Reflections collected                               | 4191 / 2590 [ <i>R</i> <sub>int</sub> = 0.0194]                                               |
| Completeness                                        | 99.6 %                                                                                        |
| Refinement method                                   | Full-matrix least-squares on <i>F</i> <sup>2</sup>                                            |
| Data / restraints / parameters                      | 2590 / 2 / 181                                                                                |
| Goodness-of-fit on <i>F</i> <sup>2</sup>            | 1.051                                                                                         |
| Final <i>R</i> indices [ <i>I</i> > 2σ( <i>I</i> )] | <i>R</i> <sub>1</sub> = 0.0613, <i>wR</i> <sub>2</sub> = 0.1787                               |
| <i>R</i> indices (all data)                         | <i>R</i> <sub>1</sub> = 0.0756, <i>wR</i> <sub>2</sub> = 0.2047                               |
| Largest diff. peak and hole (e Å <sup>-3</sup> )    | 0.257 and -0.219                                                                              |

**Table S3.** Hydrogen bonds for **10** [Å and °].

| D-H...A                      | d(D-H) | d(H...A) | d(D...A) | <(DHA) |
|------------------------------|--------|----------|----------|--------|
| <i>a</i> N(1)-H(1)...O(1)#1  | 0.8600 | 2.1500   | 2.948(6) | 154.00 |
| <i>b</i> N(2)-H(2)...O(2)#2  | 0.8600 | 2.1400   | 2.958(5) | 158.00 |
| <i>c</i> N(1)-H(1)...O(2)    | 0.8600 | 2.2900   | 2.674(6) | 108.00 |
| <i>d</i> N(2)-H(2)...O(1)    | 0.8600 | 2.3800   | 2.735(5) | 105.00 |
| <i>e</i> N(3)-H(3A)...O(3)#3 | 0.8600 | 2.1500   | 2.998(5) | 169.00 |
| <i>f</i> N(3)-H(3B)...O(3)#1 | 0.8600 | 2.1800   | 2.912(4) | 143.00 |

Symmetry transformations used to generate equivalent atoms:

#1  $x, y+1, z$  #2  $x, y-1, z$  #3  $-x+2, y+1/2, -z$

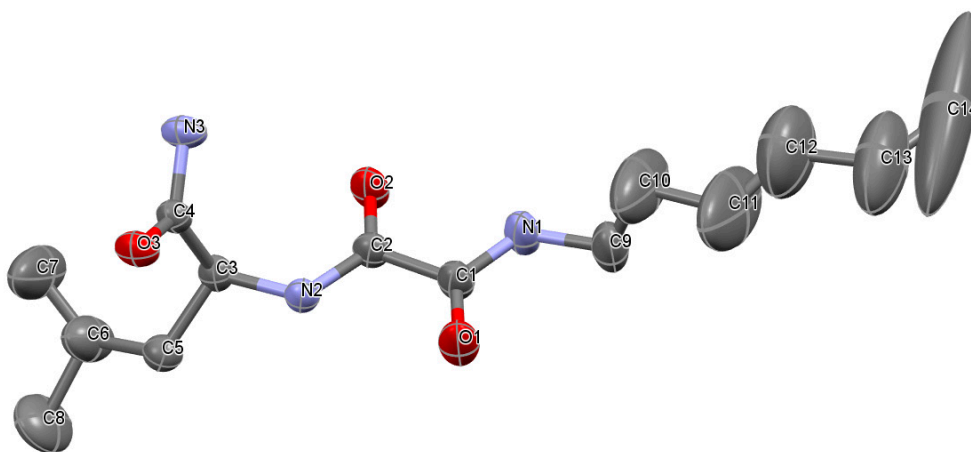

**Figure S3.** Molecular structure of **10** with the atomic numbering. Displacement ellipsoids are drawn at the 50 % probability level. It is visible that the alkyl chain C9-C14 is highly disordered.

### XRPD studies

X-ray powder diffraction data were collected on Philips MPD 1820 with CuK $\alpha$  radiation in the range 2.7-20.0 °2 $\theta$ , with a step of 0.2° and a fixed counting time of 1 second per step. Additionally, the xerogel sample was grinded in mortar for 3 hours (in order to avoid possible preferred orientation) and measured in the range 2 $\theta$  2.7- 40.0° with a counting time of 10 seconds per step with the purpose of the space group determination and structure solution.



### Structure solution from XRPD data

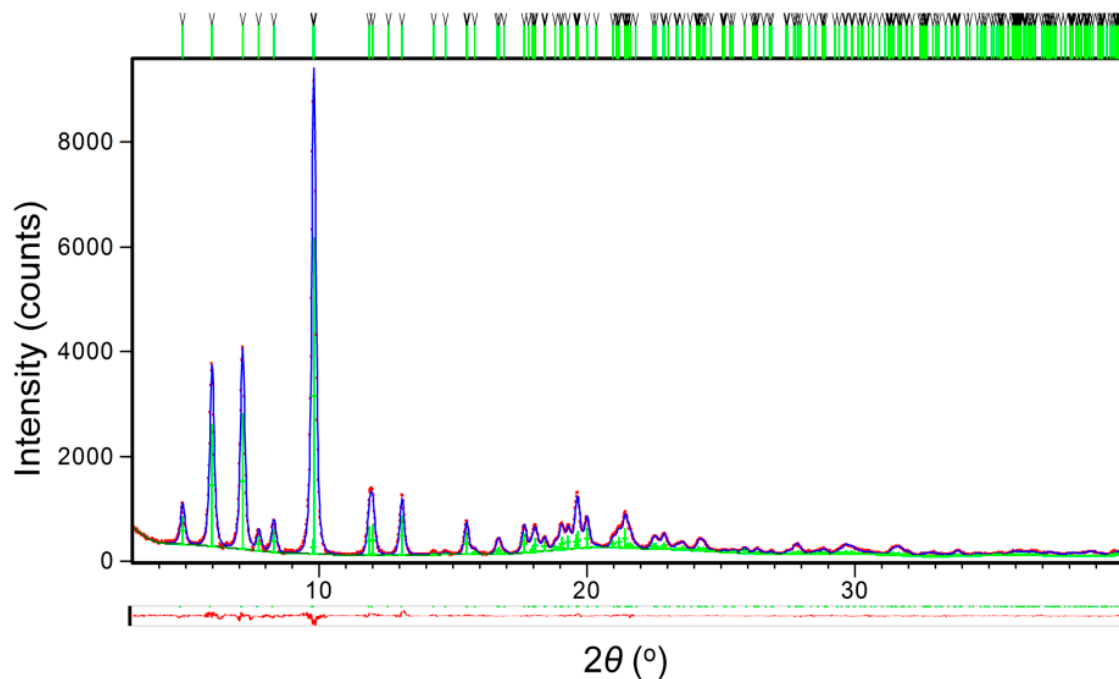

**Figure S4.** Rietveld refinements on compound **10** in the form of xerogel from toluene. Experimental data are shown as red dots, a calculated profile is shown in blue while the difference curve is provided below. Green vertical marks represent diffraction line positions of compound **10** in the form of xerogel.

Crystallographic data for the structure of **10** (determined from xerogel) are deposited in the Cambridge Structural Database under the CCDC 1524532.

**Table S4.** Crystallographic data, structure solution, and refinement for **10** (toluene xerogel).

| Compound          | <b>10</b>                                                     |
|-------------------|---------------------------------------------------------------|
| Empirical formula | C <sub>14</sub> H <sub>27</sub> N <sub>3</sub> O <sub>3</sub> |
| Formula weight    | 285.38                                                        |
| Temperature (° K) | 293(2)                                                        |
| Wavelength (Å)    | 1.5406                                                        |
| Crystal system    | orthorhombic                                                  |
| Space group       | <i>P</i> 2 <sub>1</sub> 2 <sub>1</sub> 2 <sub>1</sub>         |

|                                     |                     |
|-------------------------------------|---------------------|
| Unit cell dimensions (Å, °)         | $a = 22.837(1)$     |
|                                     | $b = 29.517(3)$     |
|                                     | $c = 5.0981(4)$     |
| Volume (Å <sup>3</sup> )            | 3436.4(5)           |
| F(000)                              | 624                 |
| Structure solution                  | Simulated annealing |
| Refinement                          | Rietveld refinement |
| Theta range for data collection (°) | 5-40                |
| R (profile)/ %                      | 6.709               |
| R (weighted profile)/ %             | 8.739               |
| GOF                                 | 2.74                |

**Table S5.** Hydrogen bonds for **10** toleune xerogel [Å and °].

| D-H...A           | $d(\text{D-H})$ | $d(\text{H...A})$ | $d(\text{D...A})$ | $\angle(\text{DHA})$ |
|-------------------|-----------------|-------------------|-------------------|----------------------|
| N(1)-H(1)...O(1)  | 0.8600          | 2.144             | 2.936(9)          | 152.6                |
| N(2)-H(2)...O(2)  | 0.8600          | 2.139             | 2.940(8)          | 154.7                |
| N(3)-H(3B)...O(3) | 0.8600          | 2.128             | 2.904(7)          | 150.5                |

## NMR study

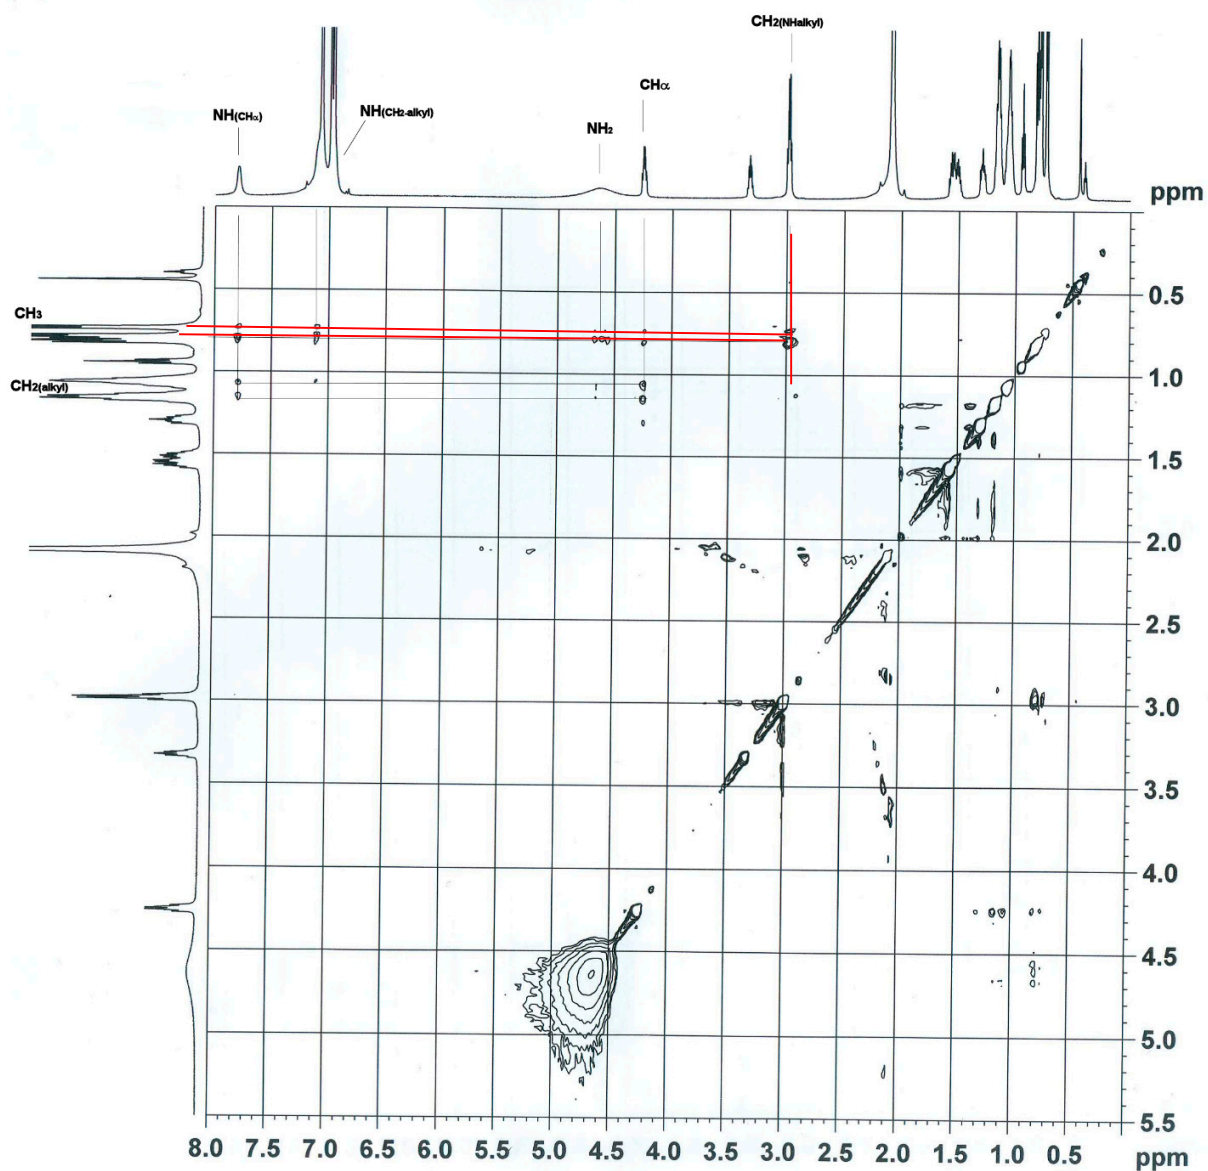

**Figure S5.** NOSY spectrum of **10** toluene- $d_8$  gel taken at 65°C with indicated intramolecular (black lines) and intermolecular (red lines) *N*-hexyl  $\alpha$ -methylene ( $\delta$  3.0 ppm) / Leu methyl ( $\delta$  0.8 ppm) interactions.

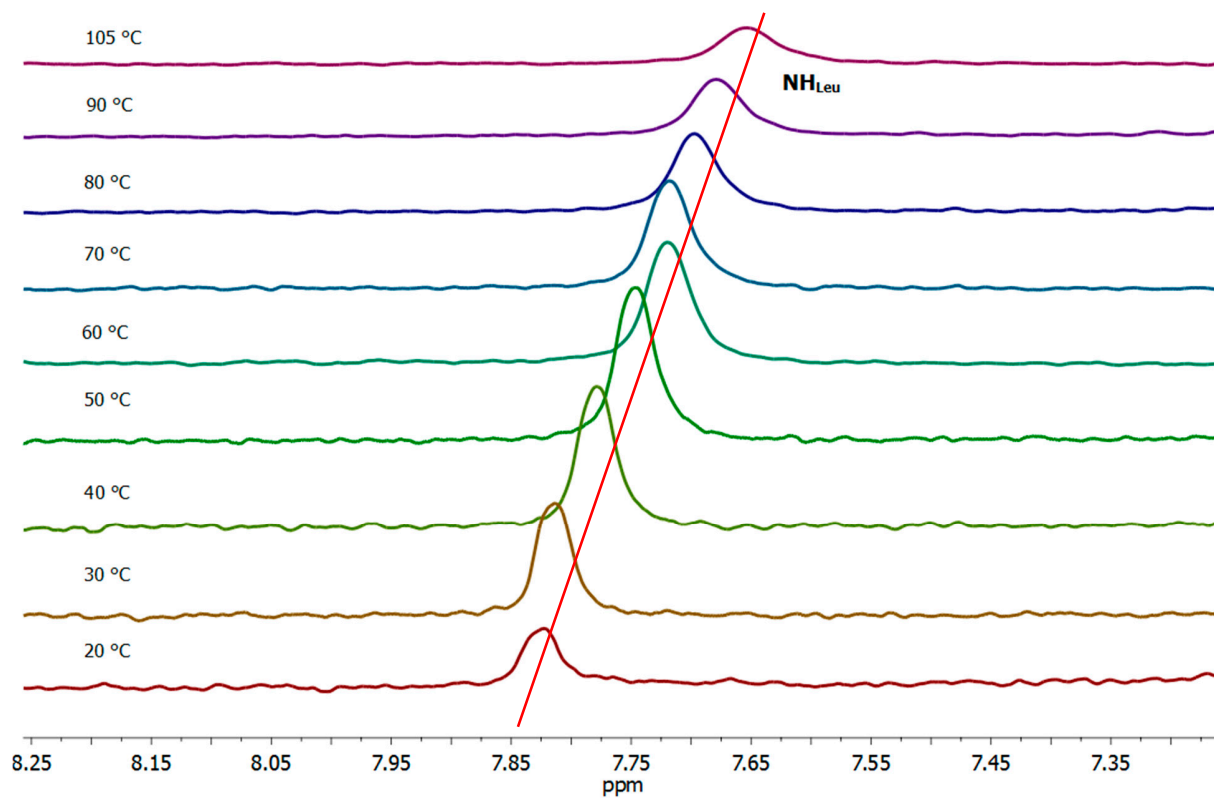

**Figure S6.** Downfield shifts of the oxalamide LeuNH protons by the temperature variation from 20 to 105°C in the NMR spectra of **10** toluene- $d_8$  gel. The slope of the red line indicates the extent of temperature-induced downfield shifts for LeuNH protons. The hexylNH protons are positioned under signals of toluene- $d_8$ .

## FTIR measurements

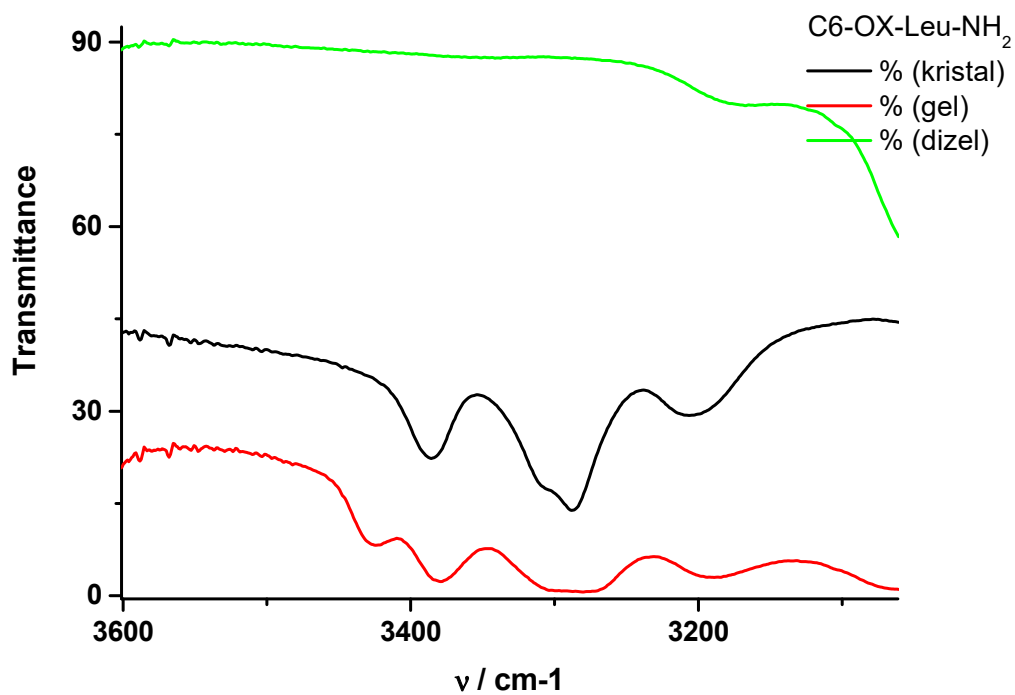

**Figure S7.** FTIR measurements of **10** crystal (black), diesel gel (red) and diesel solvent (green) at 25°C.
